# Supplementary material for: Ru@Ni3S2 nanorod arrays as highly efficient electrocatalysts for the alkaline hydrogen evolution reaction
Source: Royal Society of Chemistry journal article supplement (doi:10.1039/d2qi00673a), 2022-01-01
Supplement: d2qi00673a1.pdf [file d2qi00673a1.pdf]

## Supplementary Material

### Ru@Ni<sub>3</sub>S<sub>2</sub> Nanorod Arrays as Highly Efficient Electrocatalysts for Alkaline Hydrogen

#### Evolution Reaction

Kefeng Wang,<sup>a\*</sup> Bin Li,<sup>a, b</sup> Jingxiao Ren,<sup>a</sup> Wenxia Chen,<sup>a</sup> Jinhai Cui,<sup>a</sup> Wei Wei,<sup>a</sup> Peng Qu<sup>a, b\*</sup>

<sup>a</sup> Henan Engineering Center of New Energy Battery Materials, College of Chemistry and Chemical Engineering, Shangqiu Normal University, Shangqiu 476000, Henan, China

<sup>b</sup> College of Chemistry, Zhengzhou University, Zhengzhou 450002, China

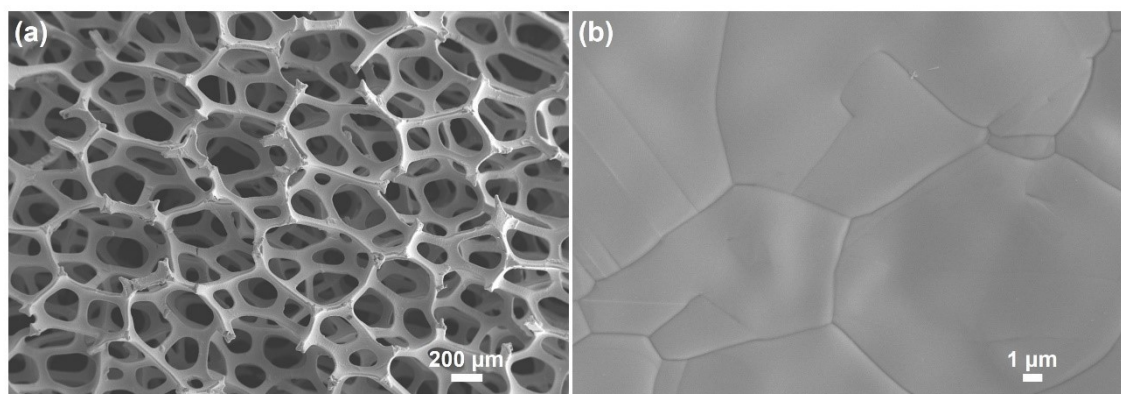

**Figure S1** SEM images of blank nickel foam

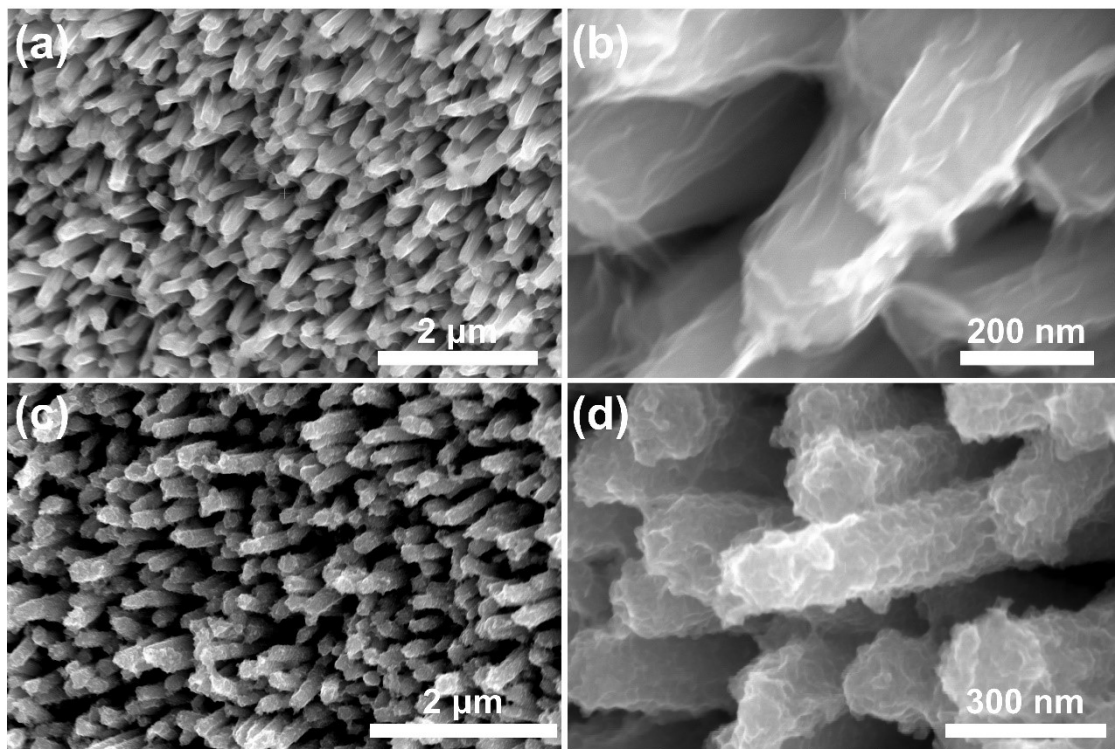

**Figure S2** SEM images of  $\text{Ni}_3\text{S}_2/\text{NF}$  (a, b) and  $\text{Ru}@ \text{Ni}_3\text{S}_2$  (c, d) with different magnifications

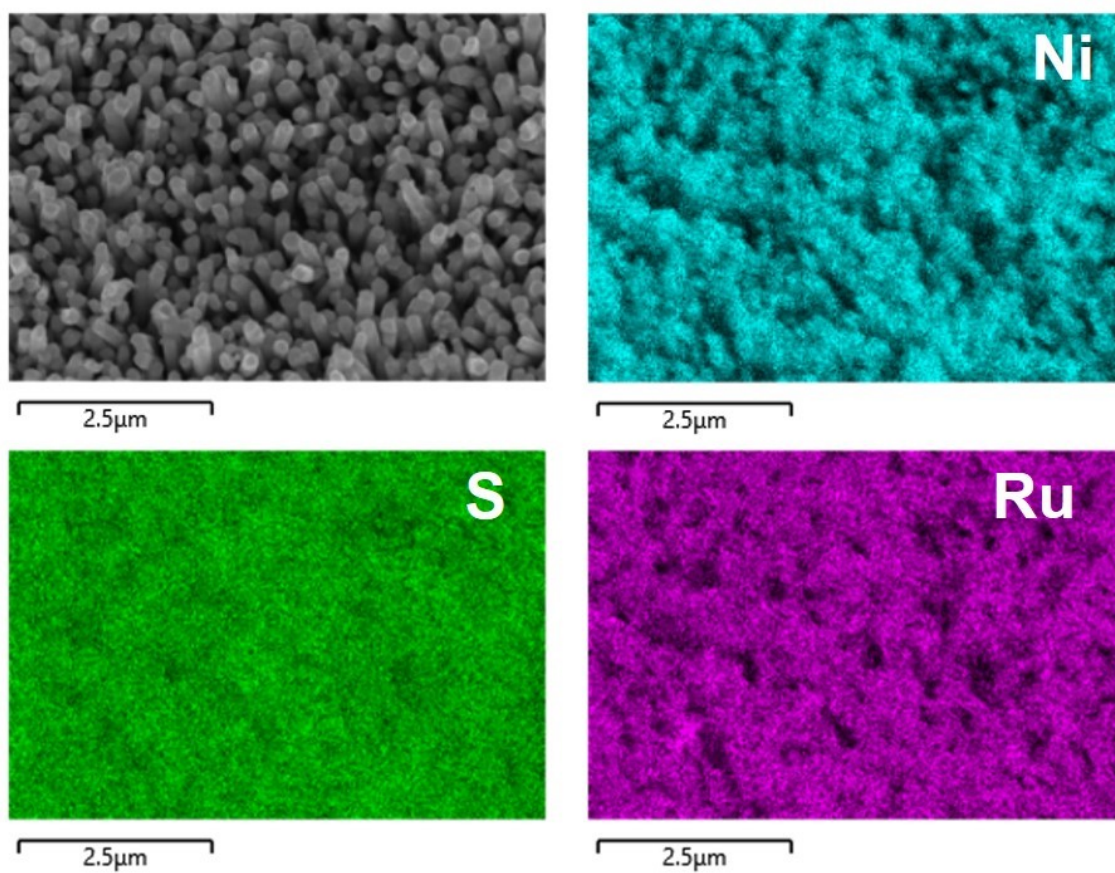

**Figure S3** SEM image and corresponding EDS mapping images of Ru@Ni<sub>3</sub>S<sub>2</sub>

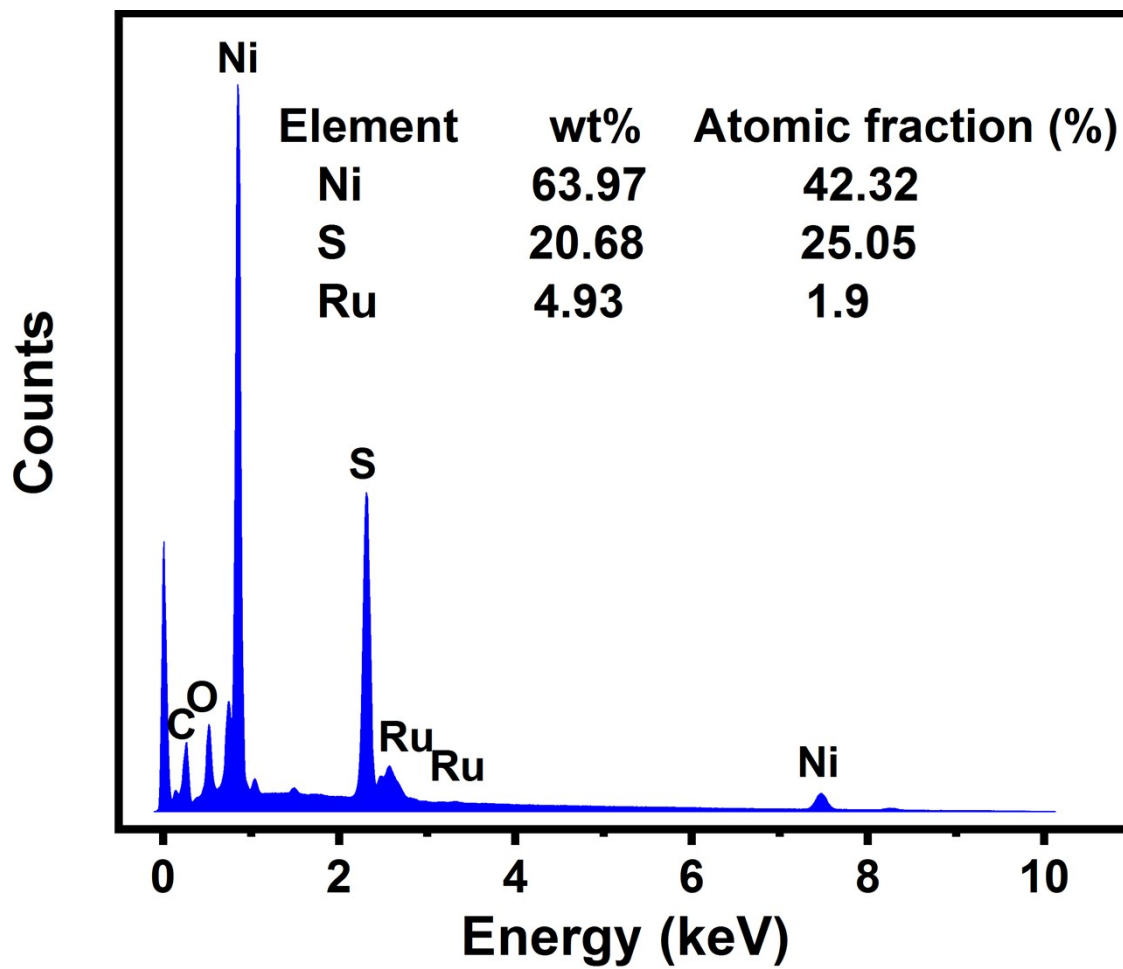

Figure S4 EDS spectrum of Ru@Ni<sub>3</sub>S<sub>2</sub> and the corresponding elemental contents.

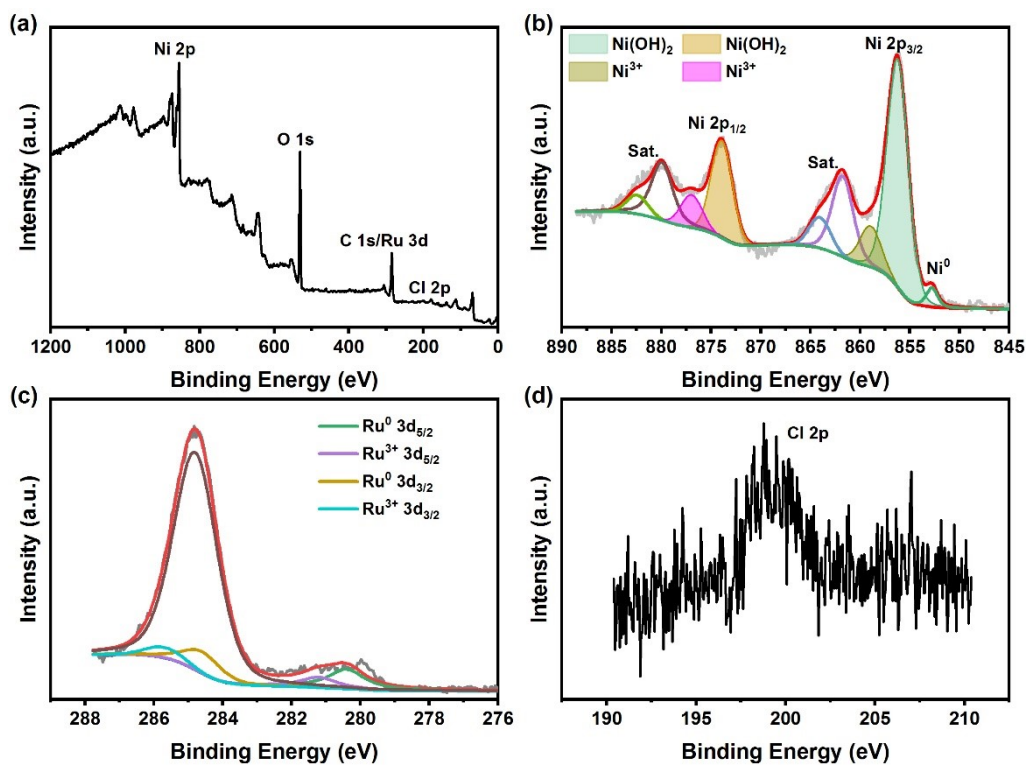

**Figure S5** XPS spectra of Ru/NF, (a) survey spectrum, (b, c, d) high-resolution Ni 2p, Ru 3d and Cl 2p spectra.

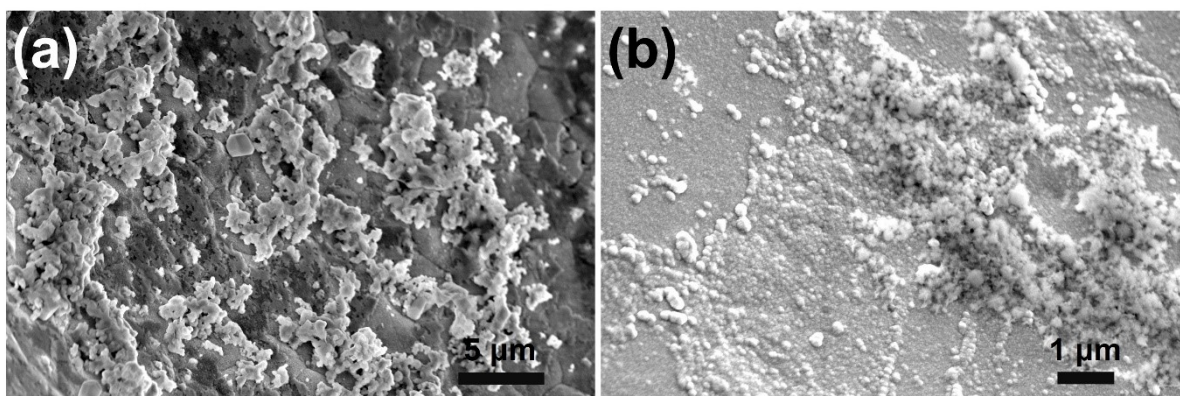

Figure S6 SEM images of Ru nanoparticles directly deposited on nickel foam (Ru/NF).

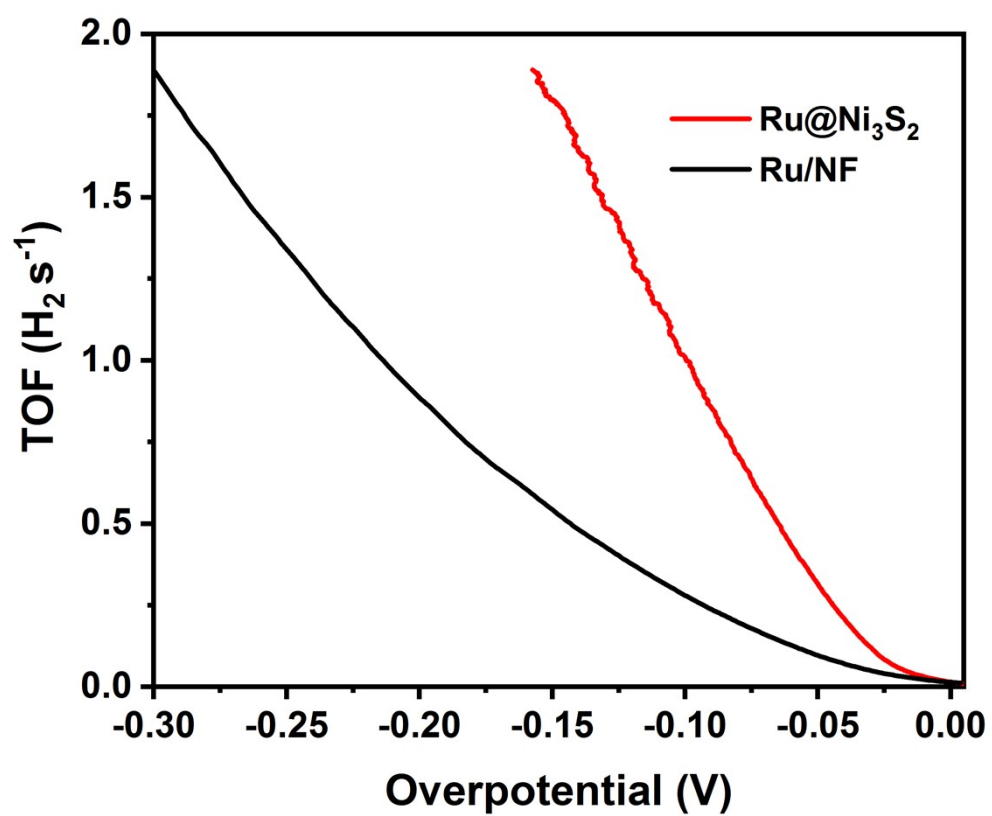

Figure S7 Comparison of TOF values at different overpotentials of Ru@Ni<sub>3</sub>S<sub>2</sub> and Ru/NF



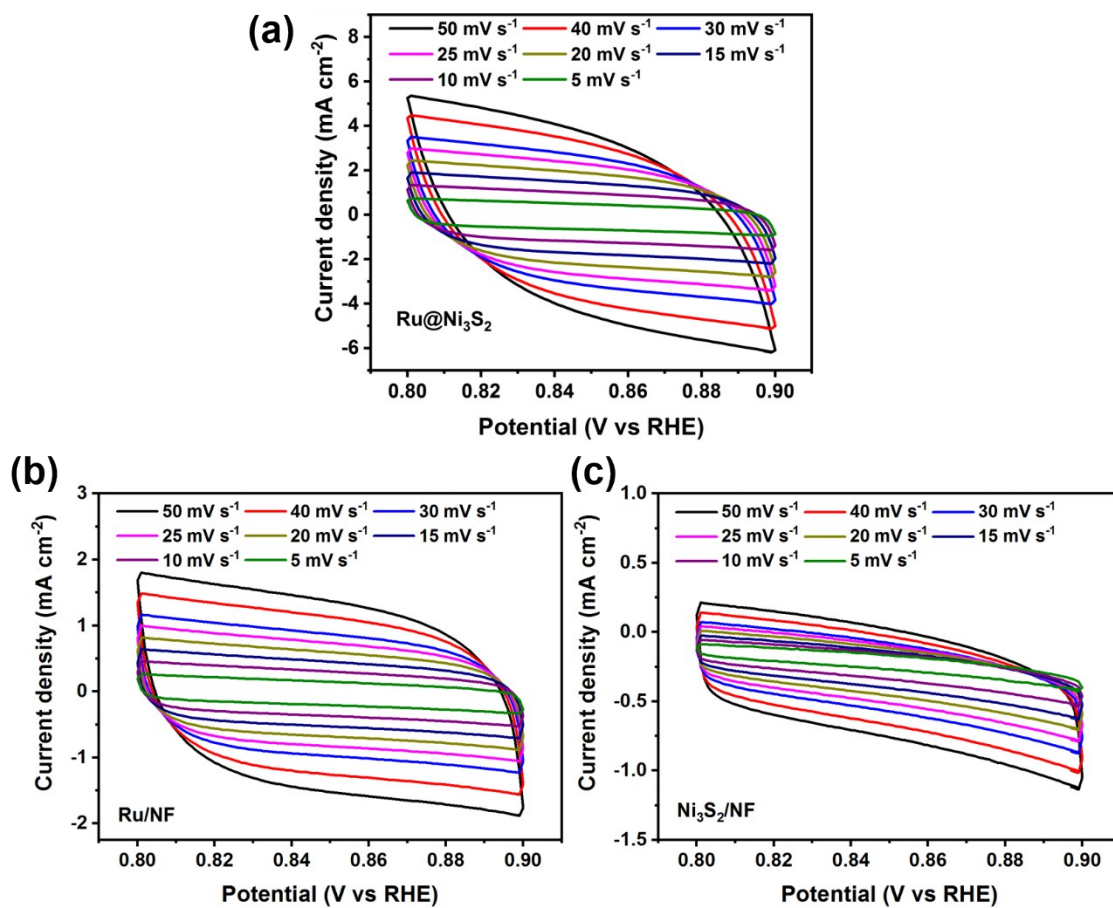

**Figure S8** Cyclic voltammetry curves of Ru@Ni<sub>3</sub>S<sub>2</sub>, Ru/NF and Ni<sub>3</sub>S<sub>2</sub>/NF at different scan rates ranging from 5 mV s<sup>-1</sup> to 50 mV s<sup>-1</sup>.

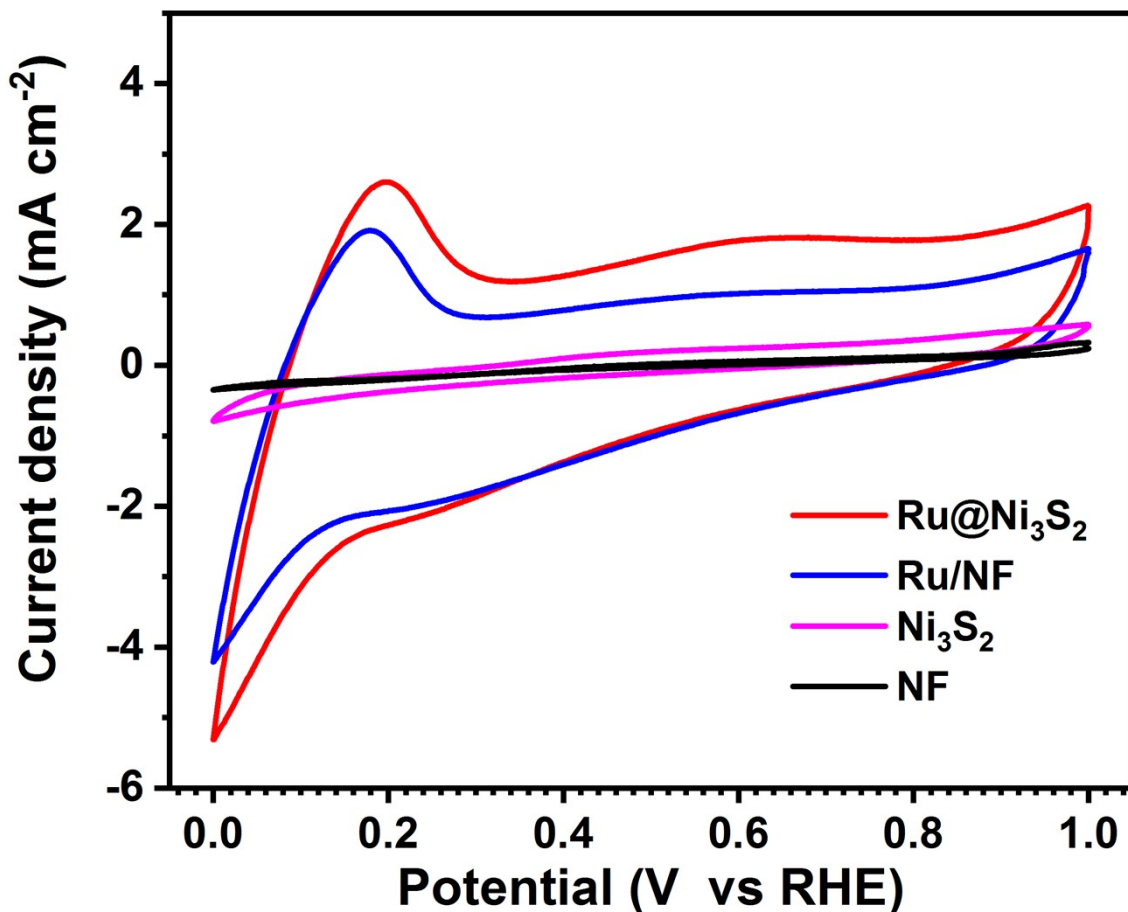

**Figure S9** Cyclic voltammetry (CV) curves of different catalysts recorded in 0.1 M KOH electrolyte at a scan rate of 5 mV s<sup>-1</sup>.

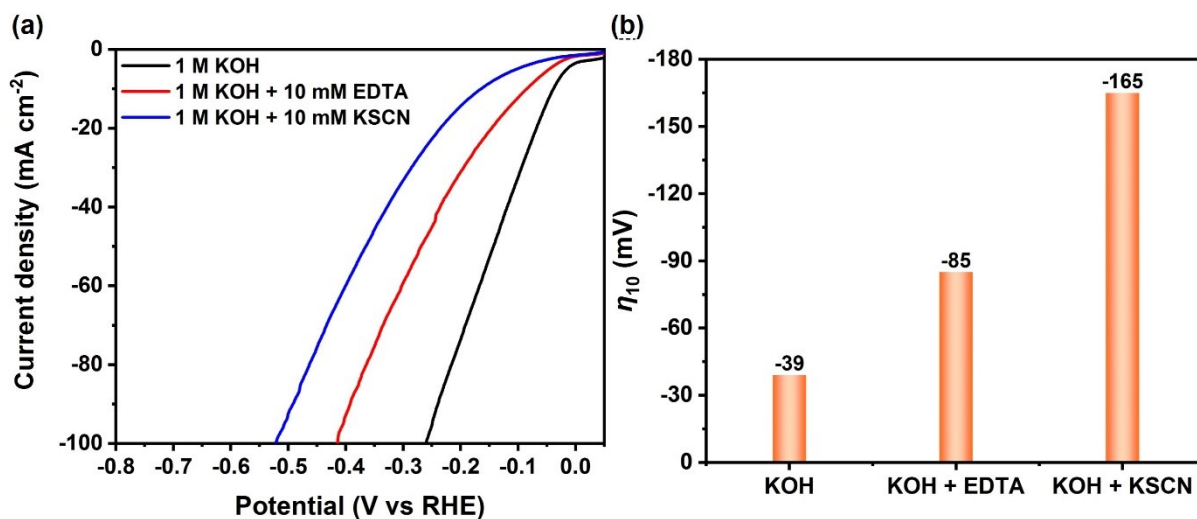

**Figure S10** (a) LSV curves (without IR-compensation) for Ru@Ni<sub>3</sub>S<sub>2</sub> in 1 mol/L KOH with the addition of 10 mmol/L EDTA or 10 mmol/L KSCN. (b) The corresponding overpotentials to deliver a current density of 10 mA cm<sup>-2</sup>.



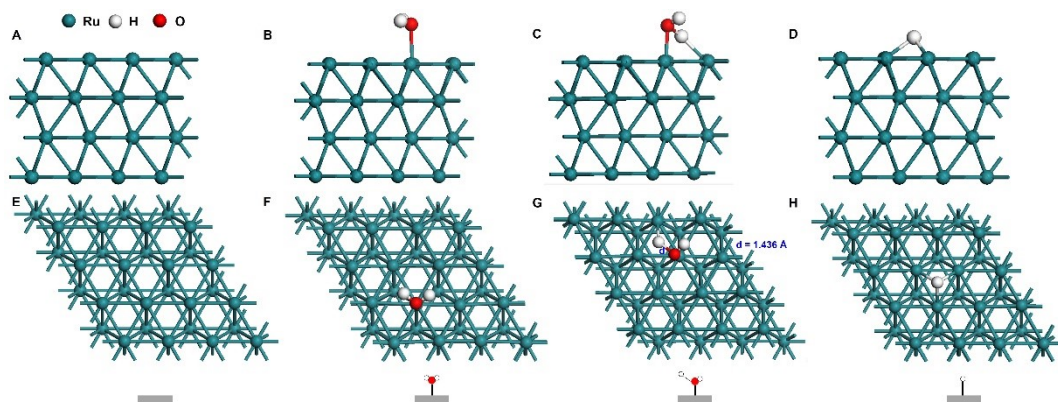

**Figure S11** Optimized structure models of Ru(001) at different stages during the HER process.

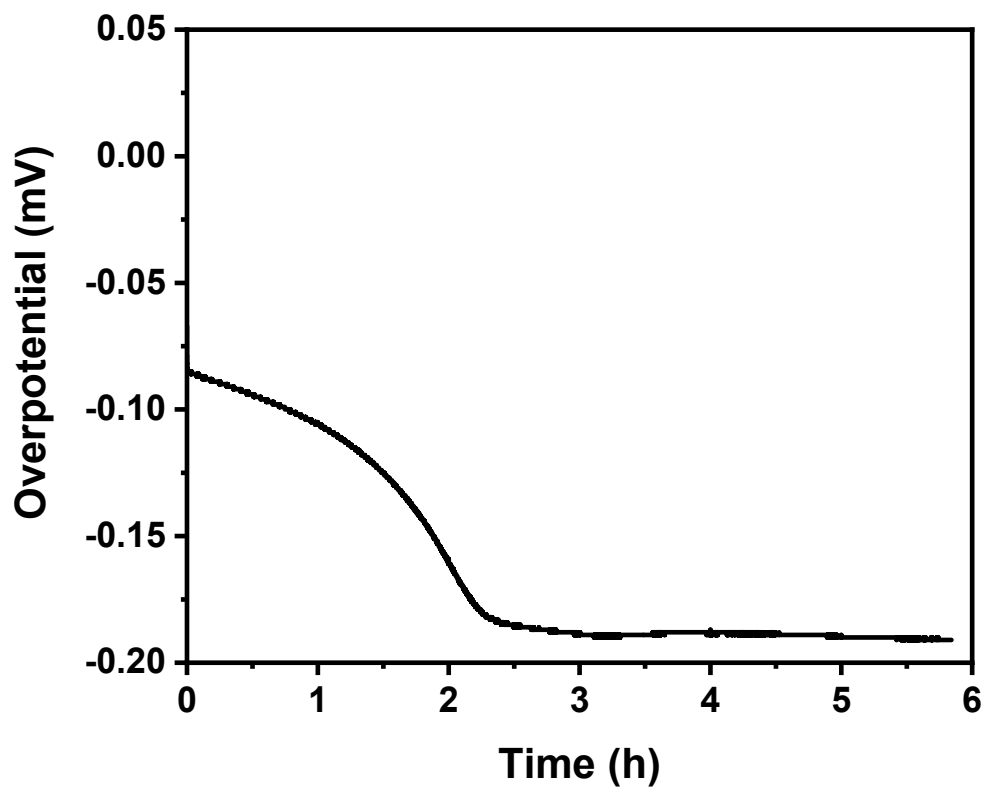

**Figure S12** Long-term stability of Ru@Ni<sub>3</sub>S<sub>2</sub> by recording the overpotential variation at a constant current density of 20 mA cm<sup>-2</sup>.

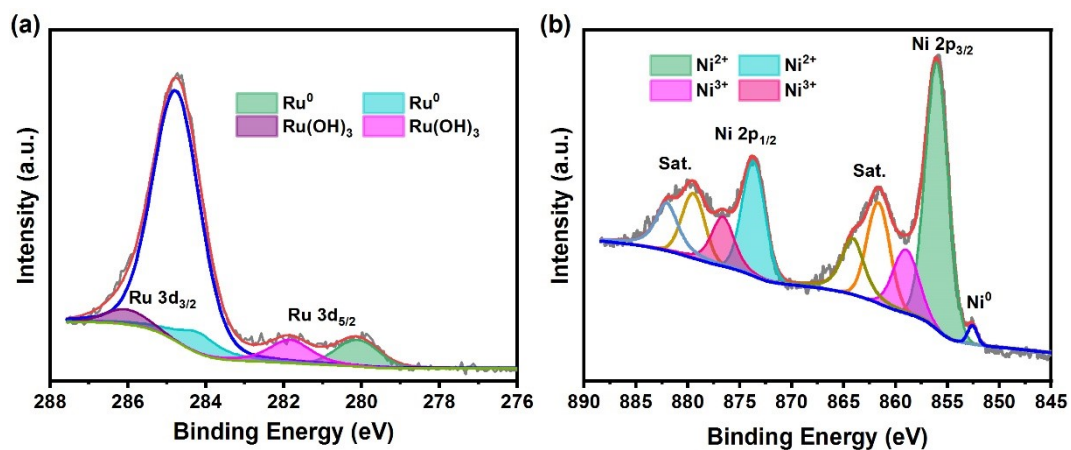

**Figure S13** High-resolution XPS spectra of Ru 3d and Ni 2p for Ru@Ni<sub>3</sub>S<sub>2</sub> after stability test.

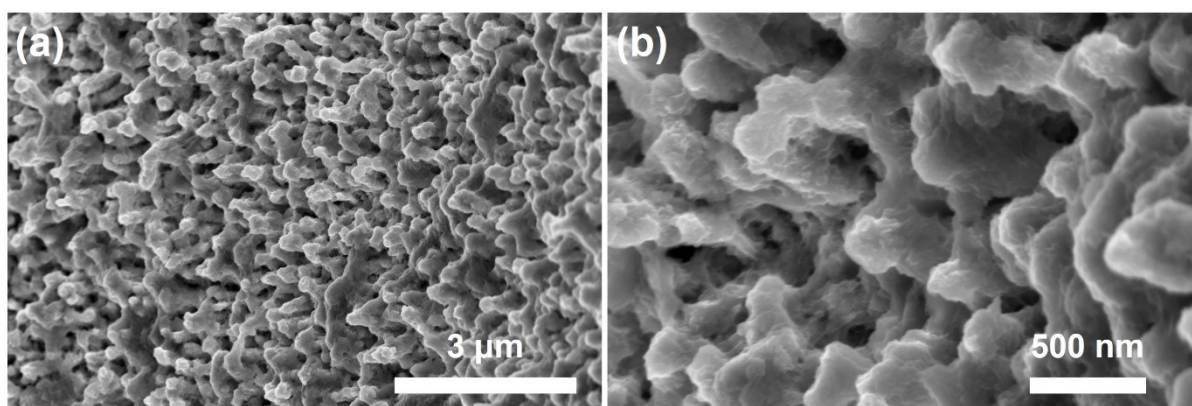

**Figure S14** SEM images of Ru@Ni<sub>3</sub>S<sub>2</sub> after long-term durability test.

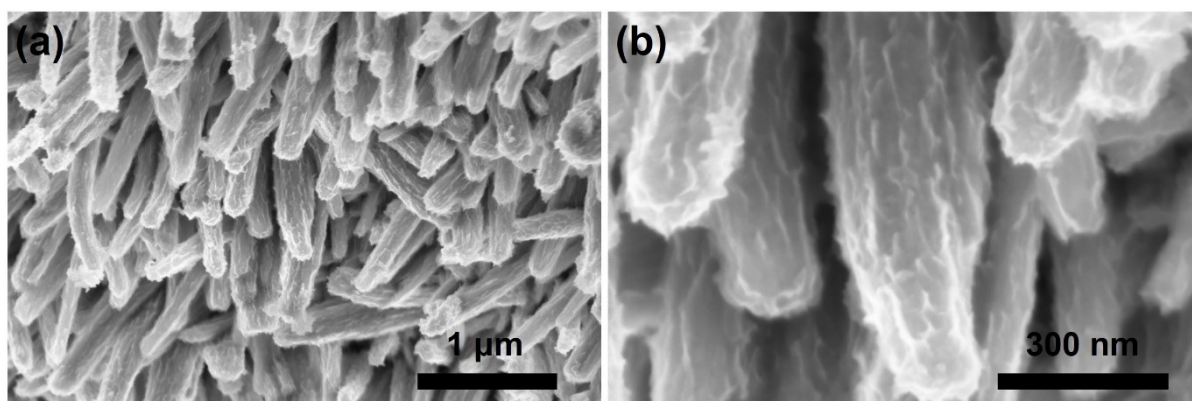

**Figure S15** SEM images of Ni<sub>3</sub>S<sub>2</sub>/NF after long-term durability test.

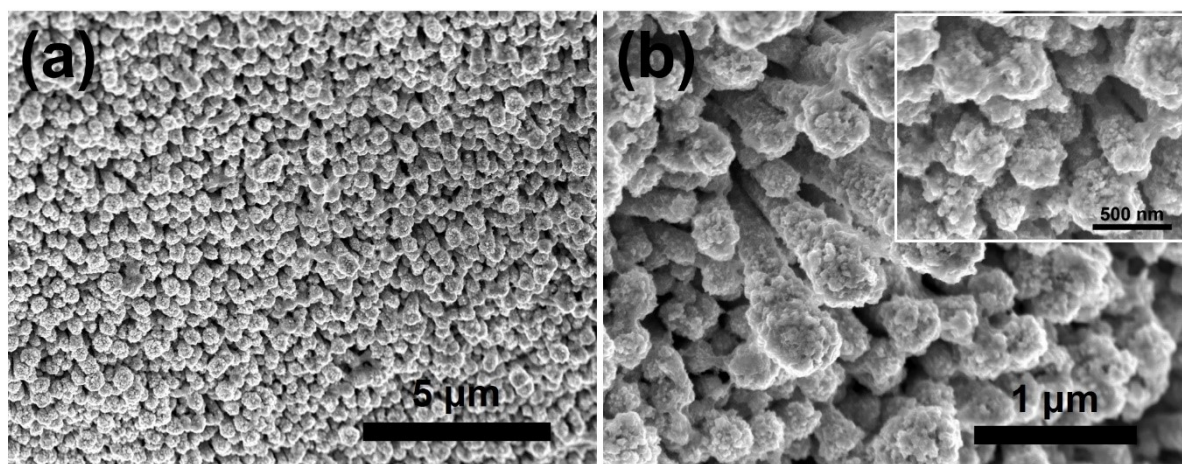

Figure S16 SEM images of PANI-Ru@Ni<sub>3</sub>S<sub>2</sub>

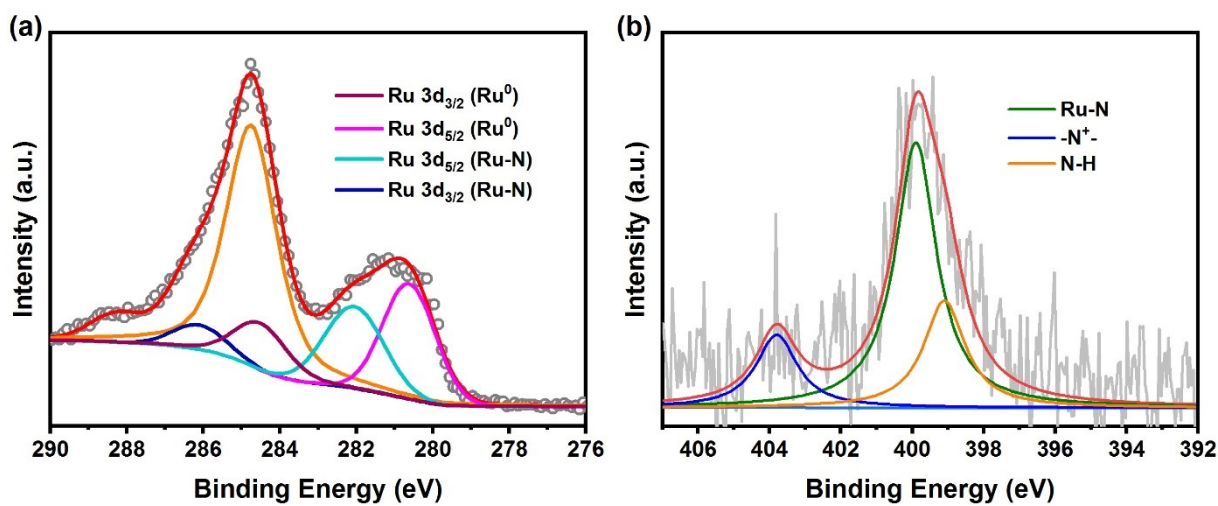

Figure S17 High-resolution Ru 3d and N 1s spectra of PANI-Ru@Ni<sub>3</sub>S<sub>2</sub>

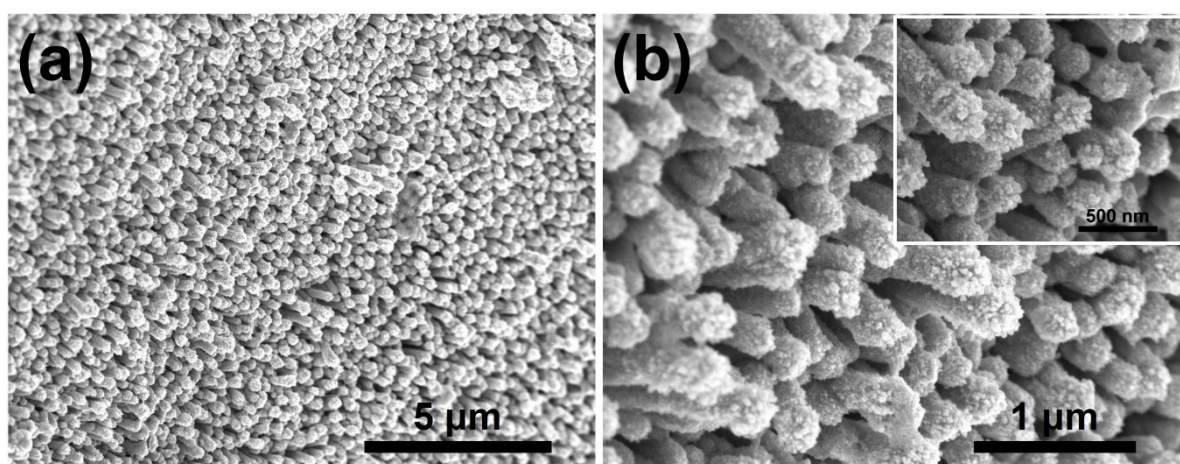

Figure S18 SEM images of PANI-Ru@Ni<sub>3</sub>S<sub>2</sub> after long-term stability test.



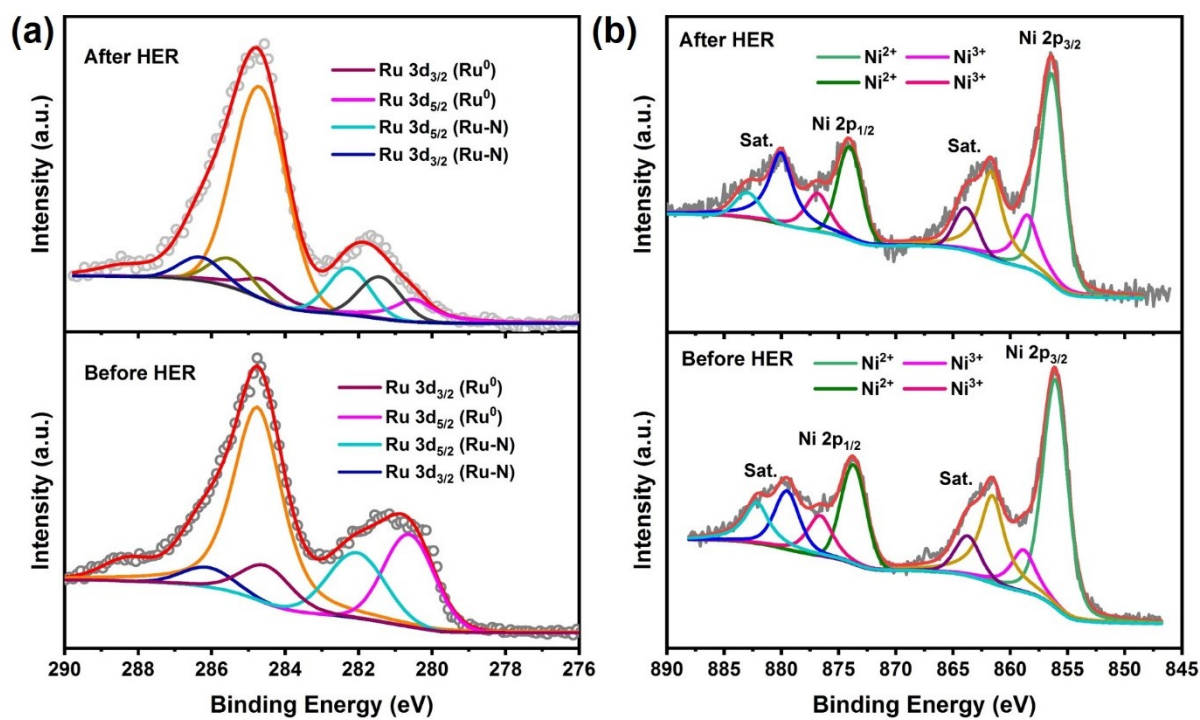

**Figure S19** High resolution Ni 2p and Ru 3d of PANI-Ru@Ni<sub>3</sub>S<sub>2</sub> (C 1s peaks omitted) before and after long-term stability test.

**Table S1** Alkaline hydrogen evolution performance of Ni<sub>3</sub>S<sub>2</sub>-based hybrids formed on nickel foam

| Catalysts                                                                                                    | $\eta@10$<br>mA cm <sup>-2</sup> (mV) | Tafel<br>slope<br>(mV dec <sup>-1</sup> ) | Ref.                                               |
|--------------------------------------------------------------------------------------------------------------|---------------------------------------|-------------------------------------------|----------------------------------------------------|
| Ru@Ni <sub>3</sub> S <sub>2</sub>                                                                            | 19.8                                  | 33.2                                      | This work                                          |
| PANI-Ru@Ni <sub>3</sub> S <sub>2</sub>                                                                       | 24.5                                  | 36.5                                      |                                                    |
| Pt nanoparticle-decorated Ni <sub>3</sub> S <sub>2</sub> microrod Array                                      | 10                                    | 73                                        | ACS Appl. Mater. Interfaces, 2020, 12:39163-39169. |
| N-doped Ni <sub>3</sub> S <sub>2</sub>                                                                       | 155                                   | 113                                       | Adv. Energy Mater., 2018, 8: 1703538               |
| Cu nanodots-decorated Ni <sub>3</sub> S <sub>2</sub> nanotubes                                               | 128                                   | 76.2                                      | J. Am. Chem. Soc., 2018, 140: 610-617              |
| MoS <sub>2</sub> /Ni <sub>3</sub> S <sub>2</sub> Nanoarrays                                                  | 76                                    | 56                                        | ACS Appl. Mater. Interfaces, 2018, 10: 1752-1760   |
| Ni <sub>3</sub> S <sub>2</sub> films grown on nanoporous copper                                              | 60.8                                  | 67.5                                      | Nano Energy, 2017, 36: 85-94.                      |
| N-anion decorated Ni <sub>3</sub> S <sub>2</sub>                                                             | 110                                   |                                           | Adv. Mater., 2017, 29: 1701584                     |
| Fe-doped Ni <sub>3</sub> S <sub>2</sub> nanosheet array                                                      | 47                                    | 95                                        | ACS Catal. 2018, 8, 5431-5441                      |
| hollow MoOx/Ni <sub>3</sub> S <sub>2</sub> composite microsphere                                             | 106                                   | 90                                        | Adv. Funct. Mater., 2016, 26: 4839-4847            |
| Ni <sub>x</sub> Co <sub>3-x</sub> S <sub>4</sub> -decorated Ni <sub>3</sub> S <sub>2</sub> nanosheet arrays  | 136                                   | 107                                       | Nano Energy, 2017, 35: 161-170                     |
| CoS <sub>x</sub> /Ni <sub>3</sub> S <sub>2</sub>                                                             | 204                                   | 133.32                                    | ACS Appl. Mater. Interfaces, 2018, 10: 27712-27722 |
| Nitrogen-doped carbon dots/ Ni <sub>3</sub> S <sub>2</sub>                                                   | 160                                   | 127                                       | Carbon, 2018, 129: 335-341                         |
| MoS <sub>2</sub> -Ni <sub>3</sub> S <sub>2</sub> Heteronanorods                                              | 98                                    | 61                                        | ACS Catal., 2017, 7: 2357-2366                     |
| Cu-doped Ni <sub>3</sub> S <sub>2</sub> nanoparticles                                                        | 121                                   | 86.2                                      | Nanoscale, 2021, 13, 2456-2464                     |
| Ni <sub>3</sub> Sn <sub>2</sub> S <sub>2</sub> dots-decorated thin Ni <sub>3</sub> S <sub>2</sub> nanosheets | 53.2                                  | 73.2                                      | Appl. Catal., B, 2020, 267: 118675                 |
| amorphous NiWO <sub>4</sub> nanoparticles-decorated Ni <sub>3</sub> S <sub>2</sub>                           | 136                                   | 112                                       | Appl. Catal., B, 2020, 274: 119120                 |
| CoMo <sub>2</sub> S <sub>4</sub> /Ni <sub>3</sub> S <sub>2</sub>                                             | 51                                    | 69                                        | Chem. Commun., 2021, 57, 785--788                  |
| Ni <sub>3</sub> S <sub>2</sub> nanosheets edged with MoS <sub>2</sub>                                        | 78                                    | 68                                        | Appl. Catal., B, 2020, 268: 118435                 |
| CoS <sub>x</sub> -Ni <sub>3</sub> S <sub>2</sub>                                                             | 120                                   | 141                                       | Appl. Catal., B, 2020, 269: 118780                 |
| Ni <sub>3</sub> S <sub>2</sub> -MoS <sub>2</sub> nanowire arrays                                             | 99                                    | 65                                        | Chem. Commun., 2020, 56: 2471-2474                 |
| δ-FeOOH/Ni <sub>3</sub> S <sub>2</sub>                                                                       | 106                                   | 82.6                                      | J. Mater. Chem. A, 2020, 8: 21199-21207            |
| Co <sub>9</sub> S <sub>8</sub> /Ni <sub>3</sub> S <sub>2</sub> heterostructure nanowire arrays               | 128                                   | 97.6                                      | Appl. Catal., B, 2019, 253: 246-252                |

|                                                                                  |     |    |                                           |
|----------------------------------------------------------------------------------|-----|----|-------------------------------------------|
| Ni <sub>3</sub> S <sub>2</sub> /MnS                                              | 116 | 41 | Appl. Catal., B, 2019, 257: 117899        |
| MoS <sub>2</sub> /Co <sub>9</sub> S <sub>8</sub> /Ni <sub>3</sub> S <sub>2</sub> | 113 | 85 | J. Am. Chem. Soc., 2019, 141: 10417-10430 |
| Ni(OH) <sub>2</sub> /Ni <sub>3</sub> S <sub>2</sub> nanoforests                  | 50  | 49 | Appl. Catal., B, 2019, 242: 60-66         |



**Table S2** Alkaline hydrogen evolution performance of Ru-based hybrids

| Catalysts                                                                                        | $\eta@10$<br>mA cm <sup>-2</sup> (mV) | Tafel<br>slope<br>(mV dec <sup>-1</sup> ) | Ref.                                          |
|--------------------------------------------------------------------------------------------------|---------------------------------------|-------------------------------------------|-----------------------------------------------|
| Ru@Ni <sub>3</sub> S <sub>2</sub>                                                                | 19.8                                  | 33.2                                      | This work                                     |
| PANI-Ru@Ni <sub>3</sub> S <sub>2</sub>                                                           | 24.5                                  | 36.5                                      |                                               |
| Ru SAs and NPs anchored on defective carbon                                                      | 18.8                                  | 35.8                                      | Adv. Sci., 2021, 2004516                      |
| carbon fiber cloth supported RuNi nanoclusters                                                   | 43                                    | 30.4                                      | Nanoscale, 2021, 13: 13042-13047              |
| two-dimensional RuBe nanosheets                                                                  | 34.8                                  | 28.9                                      | Chem. Eng. J., 2021, 421: 129741              |
| Ru nanoclusters supported on N/S doped macroporous carbon spheres                                | 32                                    | 24                                        | Nanoscale Adv., 2021, 3: 5068-5074.           |
| Ru decorated hollow N-doped carbon matrix                                                        | 49                                    | 37                                        | J. Mater. Chem. A, 2021, 9: 13958-13966       |
| Ru nanoparticles-anchored sponge-like WNO embedded in N-doped carbon layers                      | 24                                    | 39.7                                      | Nano Energy, 2021, 80, 105531.                |
| RuP clusters encapsulated in N, P-doped carbon                                                   | 15.6                                  | 31                                        | Nano Res., 2021, 14: 4321-4327.               |
| Ru nanoclusters on Co <sub>3</sub> O <sub>4</sub> porous nanowire                                | 30.96                                 | 69.75                                     | Nano Energy, 2021, 85: 105940.                |
| Ru cluster catalysts supported on Ti <sub>3</sub> C <sub>2</sub> T <sub>x</sub> MXene            | 96                                    | 159                                       | J. Phys. Chem. Lett., 2021, 12: 8016-8023.    |
| Phosphorus-modified ruthenium–tellurium dendritic nanotubes                                      | 35                                    | 30.8                                      | J. Mater. Chem. A 2021, 9: 5026-5032.         |
| Ru nanoclusters/N-doped graphene                                                                 | 25.9                                  | 32.6                                      | Carbon, 2021, 183: 362-367.                   |
| ruthenium decorated on S, N-codoped carbon                                                       | 14                                    | 28                                        | J. Mater. Chem. A, 2021, 9: 16967-16973       |
| Air plasma treated Ru doped CoNi-LDH                                                             | 29                                    | 69                                        | Small 2021, 2104323                           |
| Ru nanoparticles confined in 3D nitrogen-doped porous carbon                                     | 17                                    | 42                                        | Appl. Catal., B, 2021, 280: 119412            |
| Ru/RuO <sub>2</sub> hybrid nanoparticles on MoO <sub>2</sub>                                     | 18                                    | 50                                        | J. Colloid Interface Sci., 2021, 604: 508-516 |
| Partially reduced Ru/RuO <sub>2</sub> composites                                                 | 17                                    | 35                                        | Energy Environ. Sci., 2021, 14: 5433-5443     |
| Ru nanoparticles supported on partially reduced TiO <sub>2</sub>                                 | 15                                    | 49                                        | Nano Energy, 2021, 106211.                    |
| Ru Nanoparticles on Boron-Doped Ti <sub>3</sub> C <sub>2</sub> T <sub>x</sub> (MXene) Nanosheets | 62.9                                  | 100                                       | Small, 2021, 2102218                          |

|                                                         |    |      |                                    |
|---------------------------------------------------------|----|------|------------------------------------|
| Ru nanoclusters anchored on B/N-doped graphene          | 14 | 28.9 | Nano Energy, 2020, 68: 104301      |
| Ru on NiFe-P nanosheets                                 | 44 | 80   | Appl. Catal., B, 2020, 263: 118324 |
| Defect-rich copper-doped Ruthenium hollow nanoparticles | 25 | 50   | Chem Asian J, 2020, 15: 2868-2872  |
| Ru nanoclusters/porous carbon                           | 21 | 46.6 | Green Chem., 2020, 22: 835-842.    |

Table S3 XPS peak parameters of Ru, Ni and S species in Ru@Ni<sub>3</sub>S<sub>2</sub>

| Species |                  | B.E. (eV) | FWHM | Relative peak area (%) |
|---------|------------------|-----------|------|------------------------|
| Ru      | Ru <sup>0</sup>  | 280.5     | 1.35 | 46.9                   |
|         | Ru <sup>3+</sup> | 281.6     | 1.35 | 53.1                   |
| Ni      | Ni <sup>0</sup>  | 852.8     | 1.12 | 3.8                    |
|         | Ni <sup>2+</sup> | 856.5     | 2.68 | 82.3                   |
|         | Ni <sup>3+</sup> | 859.3     | 2.68 | 13.9                   |
| S       | S-Ni             | 162.2     | 1.4  | 100                    |

Table S4 XPS peak parameters of Ru and Ni species in PANI-Ru@Ni<sub>3</sub>S<sub>2</sub>

| Species |                  | B.E. (eV) | FWHM | Relative peak area (%) |
|---------|------------------|-----------|------|------------------------|
| Ru      | Ru <sup>0</sup>  | 280.5     | 1.62 | 55.9                   |
|         | Ru-N             | 282.1     | 1.62 | 44.1                   |
| Ni      | Ni <sup>2+</sup> | 856.5     | 2.60 | 81.5                   |
|         | Ni <sup>3+</sup> | 859.3     | 2.60 | 18.5                   |

Table S5 XPS peak parameters of Ru and Ni species in PANI-Ru@Ni<sub>3</sub>S<sub>2</sub> after stability test

| Species |                  | B.E. (eV) | FWHM | Relative peak area (%) |
|---------|------------------|-----------|------|------------------------|
| Ru      | Ru <sup>0</sup>  | 280.5     | 1.35 | 27.1                   |
|         | Ru <sup>x+</sup> | 281.4     | 1.35 | 34.4                   |
|         | Ru-N             | 282.1     | 1.35 | 38.5                   |
| Ni      | Ni <sup>2+</sup> | 856.5     | 2.40 | 74.6                   |
|         | Ni <sup>3+</sup> | 859.3     | 2.40 | 25.4                   |
